# Supplementary material for: Comparisons of regular and on-demand regimen of PED5-Is in the treatment of ED after nerve-sparing radical prostatectomy for Prostate Cancer
Source: PubMed Central journal article supplement (PMC5017160; doi:10.1038/srep32853), 2016-09-09
Supplement: srep32853-s1.pdf [file srep32853-s1.pdf]

# Comparisons of regular and on-demand regimen of PED5-Is in the treatment of ED after nerve-sparing radical prostatectomy for Prostate Cancer

Shi.Qiu<sup>1#</sup>, Zhuang Tang<sup>1#</sup>, Linghui Deng<sup>2</sup>, Liangren Liu<sup>1</sup>, Ping Han<sup>1</sup>, Lu Yang<sup>1\*</sup>, Qiang Wei<sup>1\*</sup>

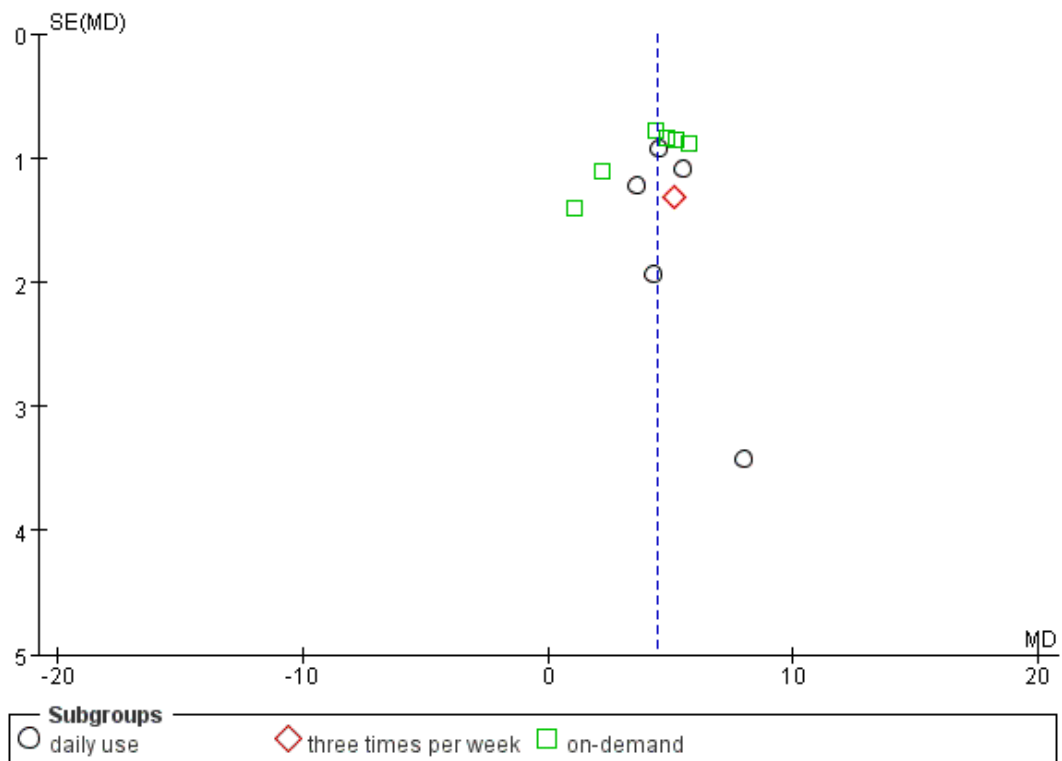

Supplementary figure S1. Funnel plot of included studies for placebo versus PDE5-Is efficacy. Circles indicate series with low risk of bias. Squares represent studies with higher risk of bias.

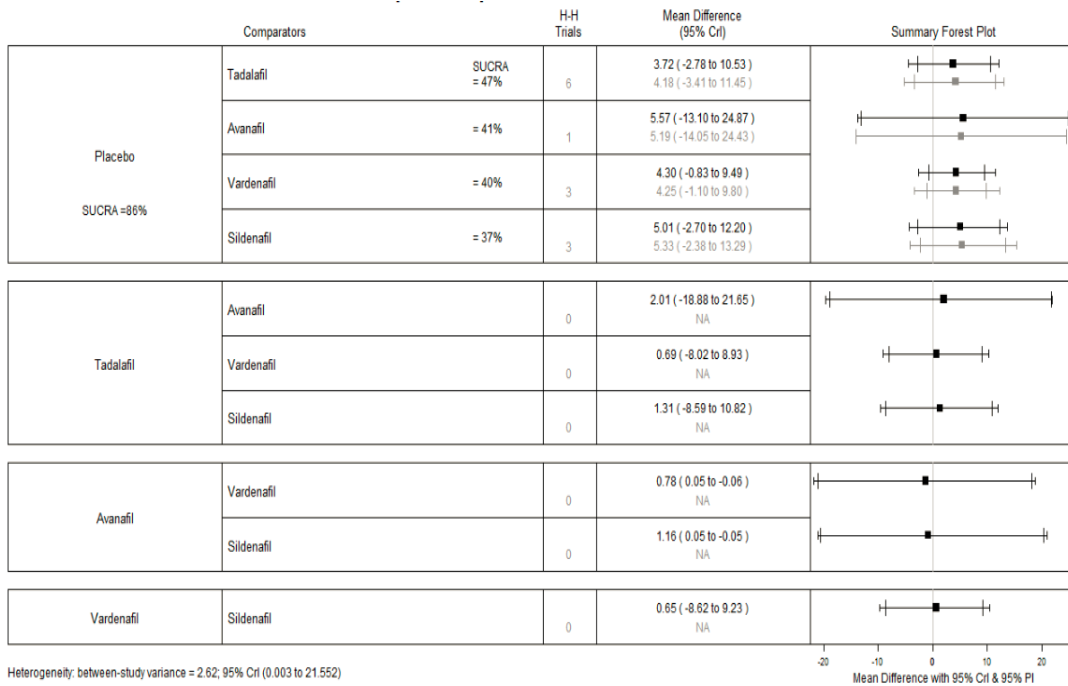

Supplementary figure S2. Summary forest plot table. H-H trials, head-to-head trials; NMA, network meta-analysis; CrI, credible interval; PI, prediction interval

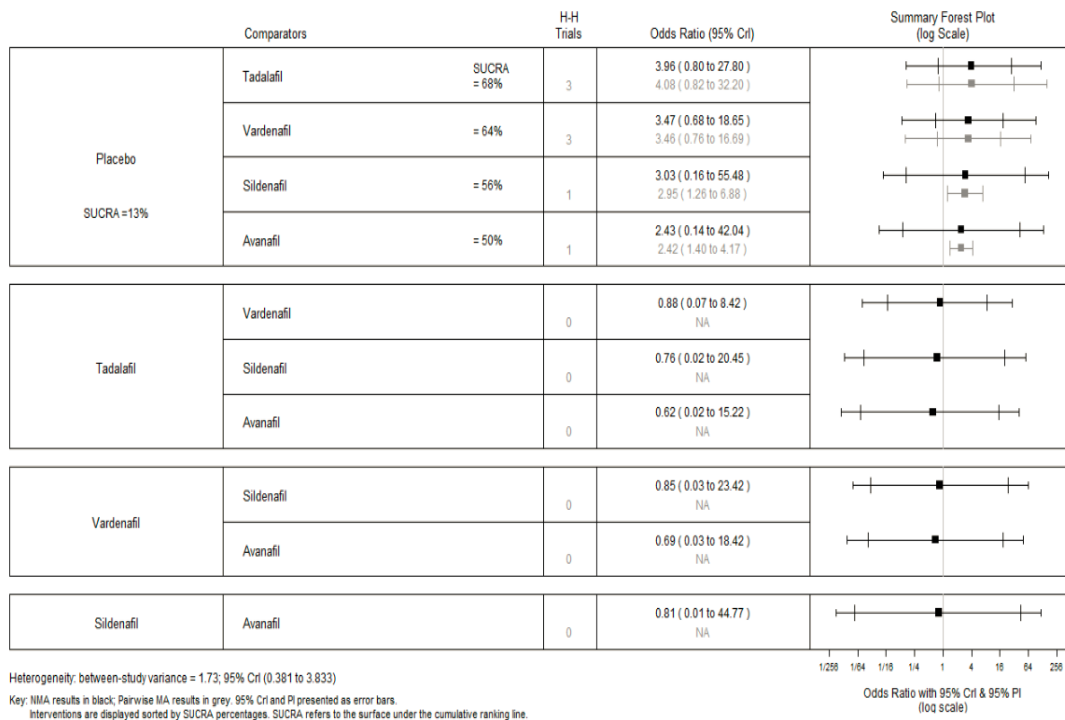

Supplementary figure S3. Summary forest plot table for PDE5-Is safety versus placebo. H-H trials, head-to-head trials; NMA, network meta-analysis; CrI, credible interval; PI, prediction interval

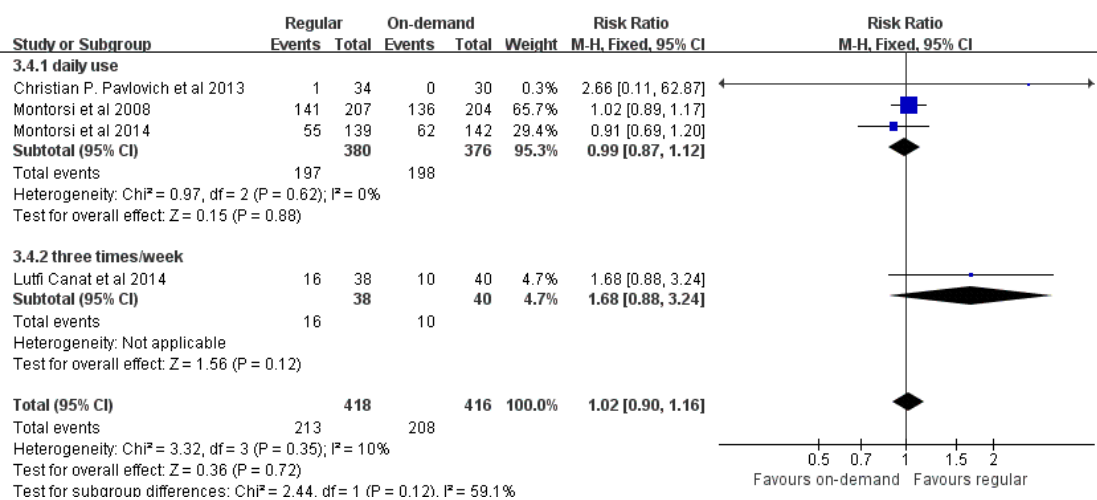

Supplementary figure S4. Forest plot of regular regimen safety versus on-demand group: Relative risk (RR) of TEAEs rate
